# Supplementary material for: Occurrence and Chemistry of Tropane Alkaloids in Foods, with a Focus on Sample Analysis Methods: A Review on Recent Trends and Technological Advances
Source: MDPI journal article supplement (doi:10.3390/foods11030407), 2022-01-30
Supplement: s1 [file s1]

## SUPPLEMENTARY MATERIALS

# Occurrence and Chemistry of Tropane Alkaloids in Foods, with a Focus on Sample Analysis Methods: A Review on Recent Trends and Technological Advances

**Table S1.** RASFF notifications from 2015 to 2021 on atropine and scopolamine in food samples.

| Date       | Notification country | Product Category            | Subject                                                                                                               | Action taken               | Distribution status                          | Risk Decision |
|------------|----------------------|-----------------------------|-----------------------------------------------------------------------------------------------------------------------|----------------------------|----------------------------------------------|---------------|
| 20/02/2015 | Austria              | Cereals and bakery products | Atropine (0.062 mg/kg - ppm) and scopolamine (0.033 mg/kg - ppm) in brown millet from Austria                         | Withdrawal from the market | Distribution to other member countries       | Serious       |
| 20/02/2015 | Germany              | Cereals and bakery products | Atropine (156.2; 207.5 µg/kg - ppb) and scopolamine (27.2; 31.3 µg/kg - ppb) in organic polenta cornmeal from Germany | Withdrawal from the market | Distribution to other member countries       | Serious       |
| 20/03/2015 | Austria              | Cereals and bakery products | Atropine (0.481 mg/kg - ppm) and scopolamine (0.533 mg/kg - ppm) in organic millet dumplings from Hungary             | Withdrawal from the market | Distribution restricted to notifying country | Serious       |
| 20/03/2015 | Austria              | Cereals and bakery products | Atropine (0.304 mg/kg - ppm) and scopolamine (0.358 mg/kg - ppm) in millet dumplings from Hungary                     | Withdrawal from the market | Distribution restricted to notifying country | Serious       |
| 30/03/2015 | Austria              | Cereals and bakery products | Atropine (26 µg/kg - ppb) and scopolamine (11 µg/kg - ppb) in millet honey poppies from Germany                       | Withdrawal from the market | No distribution from notifying country       | Serious       |
| 30/03/2015 | Austria              | Cereals and bakery products | Atropine (30 µg/kg - ppb) and scopolamine (24 µg/kg - ppb) in gluten-free millet from Austria                         | Withdrawal from the market | Distribution to other member countries       | Serious       |

|            |                |                                                   |                                                                                                                                                                          |                                |                                              |           |
|------------|----------------|---------------------------------------------------|--------------------------------------------------------------------------------------------------------------------------------------------------------------------------|--------------------------------|----------------------------------------------|-----------|
| 31/03/2015 | Germany        | Cereals and bakery products                       | Atropine (384 µg/kg - ppb) and scopolamine (388 µg/kg - ppb) in millet balls from Hungary                                                                                | Recall from consumers          | Distribution to other member countries       | Serious   |
| 04/06/2015 | Germany        | Cereals and bakery products                       | Atropine (198.5 µg/kg - ppb) and scopolamine (45 µg/kg - ppb) in organic polenta cornmeal from Germany                                                                   | Recall from consumers          | Distribution to other member countries       | Serious   |
| 18/09/2015 | Germany        | Cereals and bakery products                       | Atropine (29 µg/kg - ppb) and scopolamine (6 µg/kg - ppb) in microwave popcorn from Spain                                                                                | Recall from consumers          | Distribution to other member countries       | Serious   |
| 26/11/2015 | Czech Republic | Cereals and bakery products                       | Atropine (1200; 1500 µg/kg - ppb) and scopolamine (360; 460 µg/kg - ppb) in sorghum flour from the Czech Republic with raw material from the Czech Republic and Slovakia | Withdrawal from the market     | Distribution to other member countries       | Serious   |
| 01/02/2016 | Czech Republic | Cereals and bakery products                       | Atropine (180; 130 µg/kg - ppb) and scopolamine (36;27 µg/kg - ppb) in gluten-free baking mix and related products based on sorghum from the Czech Republic              | Destruction                    | Distribution to other member countries       | Serious   |
| 13/04/2016 | Czech Republic | Dietetic foods, food supplements, fortified foods | Atropine (7.9 µg/kg - ppb) in baby porridge without milk from Spain                                                                                                      | Withdrawal from the market     | Distribution to other member countries       | Undecided |
| 22/07/2016 | Austria        | Cereals and bakery products                       | Atropine (10.5; 12.2; 12.3 µg/kg - ppb) and scopolamine (2.0; 3.8; 3.1 µg/kg - ppb) in corn from Germany                                                                 | Withdrawal from the market     | Distribution to other member countries       | Serious   |
| 20/09/2016 | Austria        | Cereals and bakery products                       | Atropine (23.5 µg/kg - ppb) and scopolamine (9.5 µg/kg - ppb) in millet flour from Hungary                                                                               | Public warning - press release | Distribution to other member countries       | Serious   |
| 28/12/2016 | Czech Republic | Cocoa and cocoa preparations, coffee and tea      | Atropine (206.4 µg/kg - ppb) and scopolamine (31.7 µg/kg - ppb) in herbal tea from Poland                                                                                | Withdrawal from the market     | Distribution to other member countries       | Serious   |
| 02/06/2017 | Germany        | Cocoa and cocoa preparations, coffee and tea      | Atropine (0.052 %) in organic burdock root ( <i>Arctium lappa</i> ) tea from Germany, processed in Croatia, with raw material from Albania                               | Withdrawal from the market     | Distribution restricted to notifying country | Serious   |
| 24/02/2017 | Czech Republic | Cocoa and cocoa preparations, coffee and tea      | Atropine (72 µg/kg - ppb) and scopolamine (23 µg/kg - ppb) in herbal tea with Echinacea from Poland                                                                      | Return to consignor            | Distribution to other member countries       | Serious   |

|            |                |                                                   |                                                                                                                    |                                |                                              |           |
|------------|----------------|---------------------------------------------------|--------------------------------------------------------------------------------------------------------------------|--------------------------------|----------------------------------------------|-----------|
| 07/06/2017 | United Kingdom | Dietetic foods, food supplements, fortified foods | Atropine and scopolamine in dried herbs ( <i>Ruscus aculeatus</i> ) from Bulgaria                                  | No action taken                | Distribution to other member countries       | Serious   |
| 21/03/2018 | Hungary        | Nuts, nut products and seeds                      | Atropine (16177.6 µg/kg - ppb) and scopolamine (4658.3 µg/kg - ppb) in whole cumin seeds from Hungary              | Withdrawal from the market     | Distribution to non-member countries         | Serious   |
| 24/05/2018 | Germany        | Cereals and bakery products                       | Atropine (6.60 µg/kg - ppb) and scopolamine (1.77 µg/kg - ppb) in popcorn from France                              | Withdrawal from the market     | Distribution to other member countries       | Serious   |
| 05/06/2018 | Germany        | Cereals and bakery products                       | scopolamine (10.3 µg/kg - ppb) in popcorn in grain from Argentina                                                  | Recall from consumers          | distribution to other member countries       | Serious   |
| 16/07/2018 | Czech Republic | Herbs and spices                                  | Atropine (213 µg/kg - ppb) and scopolamine (44.7 µg/kg - ppb) in herbal infusion from Poland                       | Withdrawal from the market     | Distribution to other member countries       | Serious   |
| 26/09/2018 | Germany        | Cereals and bakery products                       | Atropine (60.7 µg/kg - ppb) and scopolamine (38.8 µg/kg - ppb) in organic muesli from Austria                      | Recall from consumers          | Distribution to other member countries       | Serious   |
| 20/12/2018 | France         | Cereals and bakery products                       | Atropine (53 µg/kg - ppb) and scopolamine (20 µg/kg - ppb) in organic buckwheat flour from France                  |                                | Distribution to other member countries       | Serious   |
| 29/01/2019 | Croatia        | Cocoa and cocoa preparations, coffee and tea      | Atropine (200.5 µg/kg - ppb) and scopolamine (488.7 µg/kg - ppb) in peppermint from Serbia                         | Return to consignor            | Product (presumably) no longer on the market | Serious   |
| 01/04/2019 | Croatia        | Cereals and bakery products                       | Atropine (4.5 µg/kg - ppb) and scopolamine (4.3 µg/kg - ppb) in corn grits from Serbia                             | Public warning - press release | Distribution restricted to notifying country | Serious   |
| 06/08/2019 | Netherlands    | Cereals and bakery products                       | Atropine (2.2 µg/kg - ppb) and scopolamine (2.7 µg/kg - ppb) in breakfast porridge 8 cereals with honey from Spain | Withdrawal from the market     | Distribution restricted to notifying country | Undecided |
| 26/08/2019 | France         | Cereals and bakery products                       | Atropine (47 µg/kg - ppb) and scopolamine (30 µg/kg - ppb) in organic buckwheat flour from France                  | Recall from consumers          | Distribution to other member countries       | Serious   |

|            |          |                                              |                                                                                                                                                                                         |                               |                                              |             |
|------------|----------|----------------------------------------------|-----------------------------------------------------------------------------------------------------------------------------------------------------------------------------------------|-------------------------------|----------------------------------------------|-------------|
| 24/01/2020 | Germany  | Cereals and bakery products                  | Atropine (19 µg/kg - ppb) and scopolamine (6.4 µg/kg - ppb) in organic soy flakes from Austria, with raw material from the Czech Republic                                               | Withdrawal from recipient (s) | Distribution to other member countries       | Serious     |
| 25/05/2020 | Germany  | Cocoa and cocoa preparations, coffee and tea | Atropine (543.1 µg/kg - ppb) and scopolamine (31.4 µg/kg - ppb) in organic blackberry leaves from Bulgaria                                                                              | Withdrawal from the market    | Product (presumably) no longer on the market | Serious     |
| 04/09/2020 | Germany  | Cereals and bakery products                  | Atropine (24.2 µg/kg - ppb) and scopolamine (13.3 µg/kg - ppb) in wild brown millet from Germany                                                                                        | Withdrawal from recipient (s) | distribution to non-member countries         | Undecided   |
| 04/11/2020 | Germany  | Herbs and spices                             | Atropine (26.8 µg/kg - ppb) and scopolamine (39.9 µg/kg - ppb) in peppermint from Turkey                                                                                                | Recall from consumers         | Distribution restricted to notifying country | Not serious |
| 11/12/2020 | Germany  | Cereals and bakery products                  | Atropine (36,0 ± 16,28 µg/kg - ppb) and scopolamine (22,4 ± 8,48 µg/kg - ppb) in ground wild brown millet from Germany                                                                  | Withdrawal from the market    | Distribution to other member countries       | Undecided   |
| 18/01/2021 | Germany  | Cereals and bakery products                  | High levels of scopolamine (1.2; 1.9 µg/kg - ppb) and atropine (23; 35 µg/kg - ppb) in popcorn maize from Spain                                                                         | Withdrawal from the market    | No distribution from notifying country       | Serious     |
| 17/03/2021 | Slovakia | Fruits and vegetables                        | Foodborne outbreak (tropane alkaloids) caused by, atropine (1938 µg/kg - ppb) and scopolamine (hyoscine ((-)-scopolamine): 1164 µg/kg - ppb) in deep frozen spinach puree from Slovakia | Withdrawal from the market    | Distribution to other member countries       | Serious     |

**Table S2.** Chromatographic conditions and validation parameters for the analysis of TAs.

| Alkaloids<br><i>Samples</i>                                                                                                                                                                                  | Sample<br>preparation | Analytical<br>technique<br>(analyser) | Stationary phase type<br>Brand ( <i>dimensions, particle size</i> )<br>Mobile phase                                                                                                                                                                                       | Run<br>time<br>(min) | Linear<br>range<br>( $\mu\text{g/kg}$ ) | MDL<br>( $\mu\text{g/kg}$ )                      | MQL<br>( $\mu\text{g/kg}$ )                      | RSD<br>(%)                     | Recovery (%)                         | [Ref.] |
|--------------------------------------------------------------------------------------------------------------------------------------------------------------------------------------------------------------|-----------------------|---------------------------------------|---------------------------------------------------------------------------------------------------------------------------------------------------------------------------------------------------------------------------------------------------------------------------|----------------------|-----------------------------------------|--------------------------------------------------|--------------------------------------------------|--------------------------------|--------------------------------------|--------|
| At, Sc + 4 TAs + others<br>(ergot alkaloids)<br><i>Breakfast cereals,<br/>breakfast cereals with<br/>milk, biscuits, cookies</i>                                                                             | SLE                   | HPLC-<br>MS/MS<br>(QqQ)               | C18<br>Waters Xbridge C18 ( <i>150 x 3.1 mm<br/>ID, 5 <math>\mu\text{m}</math></i> )<br>A: H <sub>2</sub> O, B: ACN:H <sub>2</sub> O (90:10 <i>v/v</i> ), both<br>with 6.5 mM NH <sub>4</sub> OH                                                                          | 17                   | 0-50                                    | 0.2-0.5 TAs<br>0.3 At<br>0.3 Sc                  | N.S                                              | 4-11 TAs<br>6 At<br>8 Sc       | 86-91 TAs<br>88 At<br>88 Sc          | [17]   |
| At, Sc + 22 TAs<br><i>Flours (buckwheat,<br/>millet and corn), cere-<br/>al-based food (break-fast<br/>cereals, biscuits, pastry,<br/>pasta and bread),<br/>legumes, stir-fry mixes,<br/>dry herbal teas</i> | SLE-SPE               | HPLC-<br>MS/MS<br>(QqQ)               | C18<br>Waters UPLC BEH C18 ( <i>150 x 2.1 mm<br/>ID, 1.7 <math>\mu\text{m}</math></i> )<br>A: H <sub>2</sub> O with 10 mM (NH <sub>4</sub> ) <sub>2</sub> CO <sub>3</sub> pH<br>10 with ammonia, B: ACN                                                                   | 15                   | 0-50                                    | 0.05-1 TAs<br>0.05-0.2 At<br>0.05-0.2 Sc         | 0.5-5 TAs<br>0.5-1 At<br>0.5-1 Sc                | 2-54 TAs<br>7-16 At<br>6-48 Sc | 20-124 TAs<br>64-112 At<br>51-117 Sc | [21]   |
| At, Sc + 22 TAs<br><i>Herbal tea infusions</i>                                                                                                                                                               | SLE-SPE               | HPLC-<br>MS/MS<br>(QqQ)               | C18<br>Waters UPLC BEH C18 ( <i>150 x 2.1 mm<br/>ID, 1.7 <math>\mu\text{m}</math></i> )<br>A: H <sub>2</sub> O with 10 mM (NH <sub>4</sub> ) <sub>2</sub> CO <sub>3</sub> pH<br>10 with ammonia, B: ACN                                                                   | 15                   | 0-50                                    | 0.0017-0.013*<br>TAs<br>0.0017* At<br>0.0017* Sc | 0.0067-0.033*<br>TAs<br>0.0067* At<br>0.0017* Sc | 2-44 TAs<br>6 At<br>6 Sc       | 51-104 TAs<br>92 At<br>90 Sc         | [21]   |
| At, Sc + 4 TAs + others<br>(pirrolizidine<br>alkaloids)<br><i>Teas and Herbal teas<br/>Green tea, black tea,<br/>chamomile, fennel,<br/>melissa, peppermint and<br/>rooibos</i>                              | SLE                   | HPLC-<br>MS/MS<br>(QTRAP)             | C18<br>Hypersil Gold C18 ( <i>50 x 2.1 mm ID,<br/>1.9 <math>\mu\text{m}</math></i> )<br>A: H <sub>2</sub> O with 0.5% FA,<br>B: MeOH/H <sub>2</sub> O/FA (94.5/5/0.5 <i>v/v/v</i> ),<br>both with oxalic acid and 2 mM<br>NH <sub>4</sub> CH <sub>3</sub> CO <sub>2</sub> | 10                   | 1-500                                   | N.S                                              | 1 At<br>1 Sc                                     | N.S                            | 80-95 TAs                            | [27]   |

|                                                                                                                                                |                   |                        |                                                                                                                                                                                        |    |         |                             |                           |                               |                                      |      |
|------------------------------------------------------------------------------------------------------------------------------------------------|-------------------|------------------------|----------------------------------------------------------------------------------------------------------------------------------------------------------------------------------------|----|---------|-----------------------------|---------------------------|-------------------------------|--------------------------------------|------|
| At, Sc + 11 Tas<br><i>Buckwheat, buck-wheat flour and pasta; soy and soy flour; peeled millet and mil-let flour; linseed and linseed flour</i> | SLE-SPE           | HPLC-HRMS (Orbitrap)   | HILIC coupled C18<br>Zorbax Eclipse Plus HILIC (100 x 2.1 mm ID, 3.5 $\mu$ m)<br>Zorbax Eclipse Plus C18 (100 x 2.1 mm ID, 1.8 $\mu$ m)<br>A: ACN, B: H <sub>2</sub> O with 0.1 % FA   | 18 | 0.5-100 | 0.1-2 TAs<br>0.5 At<br>1 Sc | 0.5-3 TAs<br>1 At<br>2 Sc | 1-20<br>3-13 At<br>3-9 Sc     | 60-109 TAs<br>63-93 At<br>63-94 Sc   | [16] |
| At, Sc<br><i>Buckwheat, buck-wheat flour and pasta, soy, wheat, amaranthus grain, chia seeds, peeled millet</i>                                | Modified QuEChERS | UHPLC-MS/MS (QqQ)      | C18<br>Zorbax Plus C18 (100 x 2.1 mm ID, 1.8 $\mu$ m)<br>A: ACN, B: H <sub>2</sub> O with 0.1 % FA                                                                                     | 10 | 0.1-100 | 0.2 At<br>0.04 Sc           | 2 At<br>0.4 Sc            | 2-17 At<br>2-11 Sc            | 66-92 At<br>50-88 Sc                 | [22] |
| At, Sc + others (pirrolizidine alkaloids)<br><i>Honey</i>                                                                                      | QuEChERS          | HPLC-HRMS (Q-Orbitrap) | C8<br><i>Ascentis Express C8 column (150 x 3 mm, ID, 2.7 <math>\mu</math>m)</i><br>A: H <sub>2</sub> O with 0.1 % FA<br>B: MeOH:ACN (1:1 v/v)                                          | 25 | 0-10.5* | 0.1 At<br>0.2 Sc            | 0.5 At<br>0.5 Sc          | 1-4 At<br>3-6 Sc              | 101-104 At<br>96-109 Sc              | [5]  |
| At, Sc<br><i>Buckwheat flour, pasta and bakery</i>                                                                                             | SLE               | UHPLC-MS/MS (QqQ)      | C18<br>C18 Kinetex (100 x 2.1 mm, ID, 2.6 $\mu$ m)<br>A: H <sub>2</sub> O, B: MeOH both with 0.2 % FA                                                                                  | 20 | 0.05-1  | 0.09 At<br>0.03 Sc          | 0.3 At<br>0.1 Sc          | 2-11 At<br>2-5 Sc             | 88-103 At<br>83-103 Sc               | [13] |
| At, Sc + 11 Tas<br><i>Teas and herbal teas</i>                                                                                                 | SLE-SPE           | HPLC-HRMS (Orbitrap)   | HILIC coupled C18<br>Zorbax Eclipse Plus HILIC (100 x 2.1 mm ID, 1.8 $\mu$ m) and Zorbax Eclipse Plus C18 (100 x 2.1 mm ID, 1.8 $\mu$ m)<br>A: H <sub>2</sub> O with 0.1% FA<br>B: ACN | 18 | 5-100   | N.S                         | 5 At<br>10 Sc             | 1-26 TAs<br>1-9 At<br>4-25 Sc | 75-128 TAs<br>99-113 At<br>96-122 Sc | [26] |

|                                                                                                                              |                             |                                 |                                                                                                                                                                                                                                                                |                                      |        |                                |                                    |                               |                                       |      |
|------------------------------------------------------------------------------------------------------------------------------|-----------------------------|---------------------------------|----------------------------------------------------------------------------------------------------------------------------------------------------------------------------------------------------------------------------------------------------------------|--------------------------------------|--------|--------------------------------|------------------------------------|-------------------------------|---------------------------------------|------|
| At, Sc + 12 TAs +<br>others (calystegines)<br><i>Bread</i>                                                                   | SLE                         | HPLC-<br>HRMS<br>(Orbitrap)     | C18<br>Zorbax Eclipse Plus C18 (100 x 2.1<br>mm ID, 1.8 µm)<br>A: H <sub>2</sub> O with 0.1% FA<br>B: MeOH                                                                                                                                                     | 14                                   | 1-5000 | N.S                            | N.S                                | 5 At<br>4 Sc                  | 75-101 TAs<br>93 At<br>88 Sc          | [39] |
| At, Sc + 11 Tas<br><i>Cereal based baby foods<br/>(pap, biscuits, snacks and<br/>grissines)</i>                              | SPE-Online                  | SPE-MS/MS<br>(Orbitrap/Q<br>qQ) | C18<br>ACE Excel 3 Super C18 (150 x 4.6 mm<br>ID, 3 µm)<br>MeOH with 0.75% NH <sub>4</sub> OH                                                                                                                                                                  | Orbi-<br>trap<br>15.8<br>QqQ<br>17.3 | 0.5-50 | 0.5-5 TAs<br>0.5At<br>1-2.5 Sc | 0.5-10 TAs<br>0.5-1 At<br>2.5-5 Sc | 5 At<br>4 Sc                  | 66-98 TAs<br>68-95 At<br>83-93 Sc     | [18] |
| At, Sc + 11 TAs +<br>others (cocaine,<br>calystegines)<br><i>Tea and pasta samples</i>                                       | SLE Pasta<br>SLE-SPE<br>Tea | HPLC-<br>HRMS<br>(Orbitrap)     | C18<br>Zorbax Eclipse Plus C18 (100 x 2.1<br>mm ID, 1.8 µm)<br>A: H <sub>2</sub> O with 0.1% FA, B: MeOH                                                                                                                                                       | 14                                   | 1-5000 | 0.5-50 TAs<br>1 At<br>2 Sc     | 1-75 TAs<br>2.5 At<br>5 Sc         | 1-13 TAs<br>2 At<br>3 Sc      | 74-98 TAs<br>93 At<br>93 Sc           | [40] |
| At, Sc + others<br>(pesticides,<br>mycotoxins, growth<br>regulators,<br>pyrrolizidine<br>alkaloids)<br><i>Oats and wheat</i> | SLE                         | 2D HPLC-<br>MS/MS<br>(QqQ)      | HILIC dimension<br>YMC-Pack Diol (100 x 2.1mm ID, 5<br>µm) with a Diol-NP guard column<br>(10 mm <sup>2</sup> x 2.1mm, 5 µm)<br>A: H <sub>2</sub> O<br>B: ACN/ H <sub>2</sub> O (90:10 v/v)<br>Both with 5 mM NH <sub>4</sub> HCO <sub>2</sub> and 0.1%<br>HAC | 26                                   | 0.2-50 | 0.05-0.06 At<br>0.08-0.12 Sc   | 0.16-0.20 At<br>0.27-0.40 Sc       | 2-6 At<br>3-11 Sc             | 75-119 At<br>72-116 Sc                | [39] |
| Sc + L-hyoscyamine +<br>other (spartein)<br><i>Porcine muscle<br/>Egg and milk</i>                                           | Modified<br>QuEChERS        | HPLC-<br>MS/MS<br>(QqQ)         | C18<br>Phenomenex Kinetex EVO C18 (150 x<br>4.6 mm ID, 5 µm)<br>A: H <sub>2</sub> O, B: MeOH, both with 0.1 %<br>FA and 10 mM NH <sub>4</sub> HCO <sub>2</sub>                                                                                                 | 8                                    | 2-30   | 1 Sc<br>0.8 L-Hyoscy.          | 5 Sc<br>2 L-Hyoscy.                | 1-5 Sc<br>1-8 L-<br>Hyoscy.   | 93-99 At<br>75-99 Sc                  | [30] |
| At, Sc + 2 Tas<br><i>Herbal teas, herbal<br/>supplements</i>                                                                 | SLE                         | UHPLC-<br>MS/MS<br>(QqQ)        | C18<br>C18 EVO Kinetex (100 x 2.1 mm ID,<br>2.6 µm)<br>A: H <sub>2</sub> O, B: ACN, both with 0.2% FA                                                                                                                                                          | 15                                   | 0.5-5  | N.S.                           | N.S                                | 0-13 TAs<br>0-4 At<br>2-13 Sc | 83-107 TAs<br>105-107 At<br>83-103 Sc | [25] |

|                                                                                                                        |                   |                      |                                                                                                                                                                                                                                                     |    |        |                                 |                               |                                    |                                       |      |
|------------------------------------------------------------------------------------------------------------------------|-------------------|----------------------|-----------------------------------------------------------------------------------------------------------------------------------------------------------------------------------------------------------------------------------------------------|----|--------|---------------------------------|-------------------------------|------------------------------------|---------------------------------------|------|
| At, Sc + 4 TAs + others<br>(ergot alkaloids)<br><i>Bread (wheat, multi-grain, rye, wheat-rye)</i>                      | SLE               | UHPLC-MS/MS (QqQ)    | C18<br>Waters Acquity BEH (160 x 2.1 mm ID, 1.7 µm),<br>A: Ammonium carbonate (10 mM, pH 9), B: ACN                                                                                                                                                 | 15 | 1-100  | 0.2-0.3 TAs<br>0.3 At<br>0.3 Sc | 0.5-1 TAs<br>1.0 At<br>0.8 Sc | 6-12 TAs<br>6 At<br>12 Sc          | 73-94 TAs<br>83 At<br>73 Sc           | [23] |
| At, Sc<br><i>Honey</i>                                                                                                 | SLE               | UHPLC-MS/MS (QqQ)    | HILIC coupled C18<br>Kinetex HILIC core-shell column (100 x 2.1 mm ID, 1.7 µm) and HILIC SecurityGuard ULTRA guard cartridge (2.1 mm)<br>A: H <sub>2</sub> O, B: ACN/water (95:5, v/v), both with 0.1% FA and 5 mM NH <sub>4</sub> HCO <sub>2</sub> | 20 | 0.01-4 | 0.002 At<br>0.003 Sc            | 0.01 At<br>0.01 Sc            | N.S                                | 87-103 At<br>87-106 Sc                | [33] |
| At, Sc + 9 TAs<br><i>Honey</i>                                                                                         | Modified QuEChERS | HPLC-HRMS (Orbitrap) | HILIC<br>ACE HILIC-A (250 x 4.6 mm ID, 3 µm)<br>A: H <sub>2</sub> O with 0.1% FA and 5 mM NH <sub>4</sub> HCO <sub>2</sub> , B: MeOH                                                                                                                | 18 | 5-100* | N.S                             | 20 At<br>20 Sc                | 0.1-20 TAs<br>1-18 At<br>0.1-20 Sc | 71-120 TAs<br>85-103 At<br>116-120 Sc | [32] |
| At, Sc<br><i>Wheat, corn, rice, oat and millet flours, mixed cereals flours, infant cereals, cereal-based products</i> | QuEChERS          | HPLC-MS/MS QqQ       | C18<br>Acquity UPLC BEH C18 (100 x 2.1 mm ID, 1.7 µm), VanGuard BEH C18 pre-column (2.1 x 5 mm ID, 1.7 µm)<br>A: H <sub>2</sub> O with 1.5 mL/L FA and 10 mM NH <sub>4</sub> HCO <sub>2</sub> , B: MeOH with 0.5 mL/L FA                            | 6  | N.S    | N.S                             | 0.5                           | 2-5 At<br>1-6 Sc                   | 95-107 At<br>87-118 Sc                | [19] |
| At, Sc<br><i>Gluten-Free Grains and Flours</i>                                                                         | SLE-SPE           | HPLC-MS/MS (QqQ)     | C18<br>C18 Kromaphase 100 (150 x 2.0 mm ID, 3.5 µm particle size), C18 Kromaphase guard (10 mm x 4.0 mm I.D, 5 µm particle size)<br>A: H <sub>2</sub> O, B: ACN, Both with 0.1% FA                                                                  | 15 | 1-500  | 0.04-0.5 At<br>0.2-1.3 Sc       | 0.1-1.5 At<br>0.7-4.4 Sc      | 4-13 At<br>6-19 Sc                 | 93-105 At<br>93-96 Sc                 | [14] |



|                                                                                                                                |                   |                            |                                                                                                                                                                                                                                                                                                                                                                                                                                                                                                                                                 |    |           |                          |                                    |                               |                                      |      |
|--------------------------------------------------------------------------------------------------------------------------------|-------------------|----------------------------|-------------------------------------------------------------------------------------------------------------------------------------------------------------------------------------------------------------------------------------------------------------------------------------------------------------------------------------------------------------------------------------------------------------------------------------------------------------------------------------------------------------------------------------------------|----|-----------|--------------------------|------------------------------------|-------------------------------|--------------------------------------|------|
| At, Sc + 19 TAs +<br>others (pirrolizidine<br>alkaloids)<br>Sorghum, oregano,<br>herbal tea                                    | SLE               | UHPLC-<br>MS/MS<br>(QTRAP) | C18<br>Luna Omega C18 (150 × 2.1 mm I.D,<br>1.6 µm)<br>A: H <sub>2</sub> O, B: MeOH, both with 0.2 %<br>FA and 2 mM NH <sub>4</sub> HCO <sub>2</sub>                                                                                                                                                                                                                                                                                                                                                                                            | 22 | 0.5-1000  | N.S                      | 0.5–10 TAs<br>0.5-2 At<br>0.5-2 Sc | 1-19 Tas<br>2-11 At<br>1-9 Sc | 78-115 TAs<br>98-111 At<br>84-110 Sc | [38] |
| At, Sc<br>Spinach-based<br>products                                                                                            | QuEChERS-<br>dSPE | UHPLC-<br>MS/MS<br>(QqQ)   | C18<br>Zorbax Eclipse Plus C18 (50 × 2.1 mm<br>ID, 1.8 µm)<br>A: H <sub>2</sub> O, B: MeOH, both with 0.1%<br>FA and 5 mM NH <sub>4</sub> HCO <sub>2</sub>                                                                                                                                                                                                                                                                                                                                                                                      | 5  | 0.025-25  | N.S                      | 0.014-0.018 At<br>0.015-0.018 Sc   | 0.3-4 At<br>0.2-5.2 Sc        | 94-103 At<br>91-98 Sc                | [29] |
| At, Sc<br>Thyme, basil and<br>coriander                                                                                        | SLE-SPE           | HPLC-<br>MS/MS<br>(QqQ)    | C18<br>C18 Kromaphase 100 (150 × 2.0 mm<br>ID, 3.5 µm particle size), C18<br>Kromaphase guard (10 mm × 4.0 mm<br>I.D, 5 µm particle size)<br>A: H <sub>2</sub> O, B: ACN, Both with 0.1% FA                                                                                                                                                                                                                                                                                                                                                     | 15 | 0.005-0.2 | 0.8-2.1 At<br>2.6-6.8 Sc | 1.2-2.2At<br>4-7.2 Sc              | 3-8 At<br>2-14 Sc             | 87-92 At<br>70-92 Sc                 | [28] |
| At, Sc + others<br>(mycotoxins, plant<br>growth regulators,<br>pesticides)<br><i>Wheat, barley, rice, oats,<br/>spelt, rye</i> | SLE               | 2D-LC-<br>MS/MS<br>(QqQ)   | 1 <sup>st</sup> dimension - HILIC Column<br>YMC-Pack Diol-NP (100 × 2.1 mm ID,<br>5 µm particle size), guard column<br>cartridge (10 × 2.1 mm ID, 5 µm)<br>Trap - ZORBAX SB-C8 (12 × 4.6 mm<br>ID, 5 µm)<br>2 <sup>nd</sup> dimension - Raptor FluoroPhenyl<br>(50 × 2.1 mm ID, 2.7 µm), Raptor<br>Biphenyl (50 × 2.1 mm ID, 2.7 µm),<br>FluoroPhenyl guard column<br>(5 × 2.1 mm ID, 2.7 µm),<br>1 <sup>st</sup> dimension - A: H <sub>2</sub> O, B:<br>ACN/water (90:10 v/v), both with<br>0.1% FA and 10 mM NH <sub>4</sub> HCO <sub>2</sub> | 25 | 5-200     | N.S.                     | 5 At<br>5 Sc                       | 4-12 At<br>3-9 Sc             | 103 At<br>105 Sc                     | [42] |

---

2<sup>nd</sup> dimension - A: H<sub>2</sub>O, B: MeOH,  
both with 0.001% FA and 5 mM  
NH<sub>4</sub>HCO<sub>2</sub>

---

Abbreviations: ACN: acetonitrile. At: Atropine. dSPE: dispersive solid-phase extraction. EtOH: Ethanol. FA: formic acid. HAC: Acetic acid. HILIC: Hydrophilic interaction chromatography. HPLC-HRMS: high-performance liquid chromatography-high resolution mass spectrometry. HPLC-MS/MS: high-performance liquid chromatography–tandem mass spectrometry. LC: liquid chromatography. L-Hyoscy.:L-Hyoscyamine. MeOH: methanol. MDL: method detection limit. MQL: method quantification limit. MS: Mass spectrometry. N.S: Not shown. Q: single quadrupole. QqQ: triple quadrupole. QTRAP: quadrupole-ion trap. QuEChERS: Quick, Easy, Cheap, Effective, Rugged & Safe. RSD: Relative Standard Deviation. Sc: Scopolamine. SLE: solid-liquid extraction. SPE: Solid-phase extraction. TAs: Tropane alkaloids. UHPLC-MS/MS: ultra-high-performance liquid chromatography–tandem mass spectrometry. 2D: Two-dimensional. \*Expressed in µg/L.

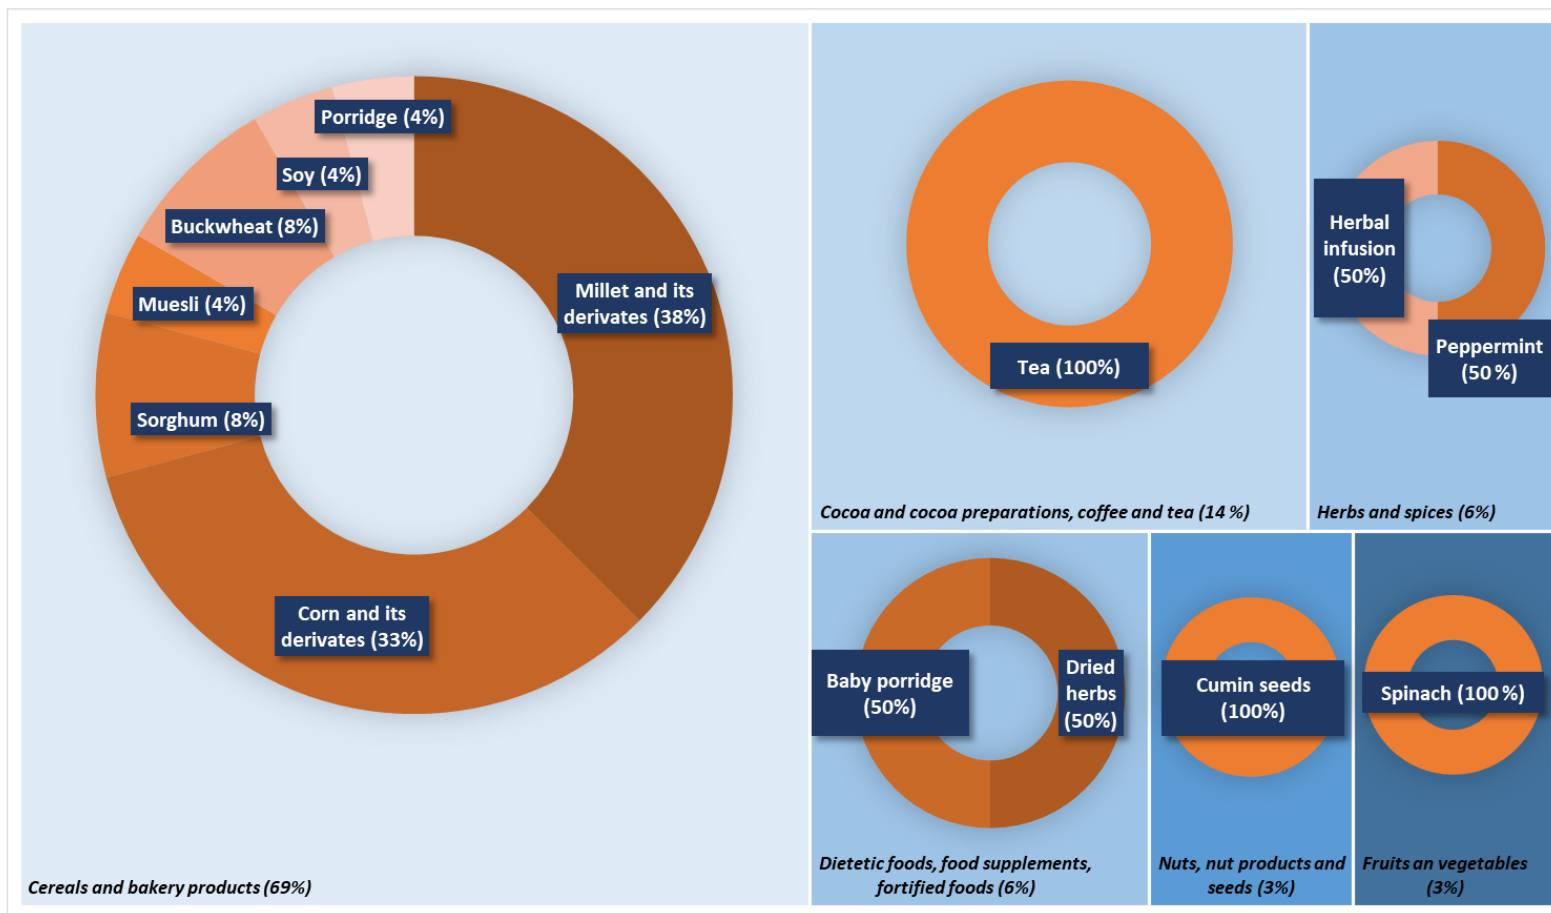

**Figure S1.** RASFF notifications of TAs by food category and food type (from 2015 to 2021).
